# Supplementary material
Source: Springer Nature journal article supplement (https://www.springermedizin.de/resource/supplementary/12885_2011_3022_MOESM4_ESM.pdf/9462756)

400  $\mu\text{m}$

600  $\mu\text{m}$

800  $\mu\text{m}$

KI67

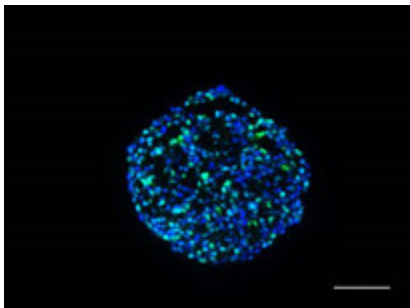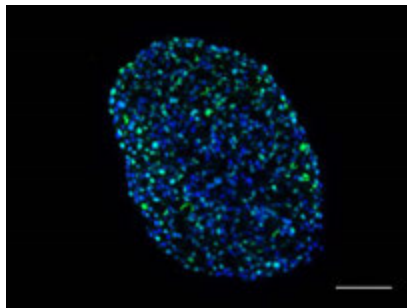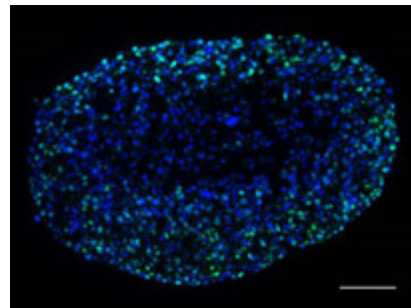

Cleaved PARP

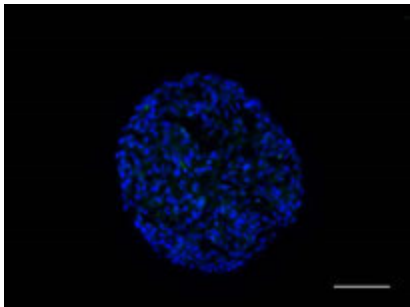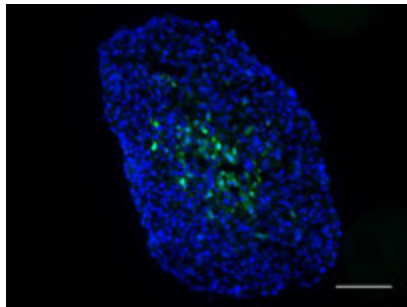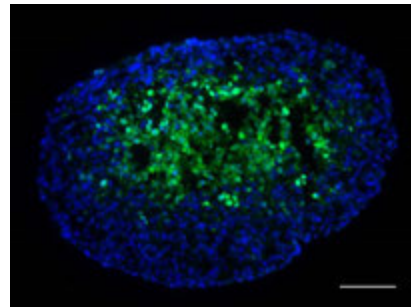

Supplement: MOESM4 [file 9462756]
